# Supplementary material for: ERβ Expression and Breast Cancer Risk Prediction for Women with Atypias
Source: Oxford University Press journal article supplement (doi:10.1158/1940-6207.capr-15-0198), 2015-08-14
Supplement: 19406207capr150198-sup-149727_1_table_3061008_nrjvpf.docx [file 19406207capr150198-sup-149727_1_table_3061008_nrjvpf.docx]

**Supplemental Table 1S. ERβ staining in atypical ductal hyperplasia (ADH) versus atypical lobular hyperplasia (ALH).**

|  | **ADH**  N=79 | **ALH**  N=92 | **p-value** |
| --- | --- | --- | --- |
| **Nuclear % Staining** |  |  | 0.0002 |
| <1% | 8 (10.1%) | 0 (0.0%) |  |
| 1-25% | 24 (30.4%) | 17 (18.5%) |  |
| 26-50% | 27 (34.2%) | 32 (34.8%) |  |
| 51-75% | 19 (24.1%) | 37 (40.2%) |  |
| >75% | 1 (1.3%) | 6 (6.5%) |  |
| **Nuclear Intensity** |  |  | 0.06 |
| Negative | 2 (2.5%) | 0 (0.0%) |  |
| Weak | 55 (69.6%) | 54 (58.7%) |  |
| Intermediate | 17 (21.5%) | 31 (33.7%) |  |
| Strong | 5 (6.3%) | 7 (7.6%) |  |
| **Sum Score**, median (range) | 3 (0-7) | 4 (2-7) | 0.0004 |
| **Sum Score Group** |  |  | 0.001 |
| Low | 29 (36.7%) | 15 (16.3%) |  |
| Moderate | 48 (60.8%) | 69 (75.0%) |  |
| High | 2 (2.5%) | 8 (8.7%) |  |
